# Supplementary material
Source: bioRxiv or medRxiv preprint supplement (https://www.biorxiv.org/highwire/filestream/83491/field_highwire_adjunct_files/0/270744-1.pdf)
Supplement: Supplementary file [file 270744-1.pdf]

| Ind | Market      | Age      | Sex    | Ethnicity | PostCode     | Lemon-Detect | Mint-Detect | Clove-Detect |
|-----|-------------|----------|--------|-----------|--------------|--------------|-------------|--------------|
| 1   | St. Alban's | 25 to 34 | Male   | White     | AL4GTY       | 1            | 1           | 1            |
| 2   | St. Alban's | 18 to 24 | Male   | White     | AL21EF       | 1            | 1           | 1            |
| 3   | St. Alban's | 25 to 34 | Male   | White     | WD65AL       | 1            | 1           | 1            |
| 4   | St. Alban's | 18 to 24 | Female | Black     | LU15HD       | 1            | 1           | 1            |
| 5   | St. Alban's | 65+      | Male   | White     | CT26EN       | 1            | 1           | 1            |
| 6   | St. Alban's | 65+      | Female | White     | CT26EN       | 1            | 1           | 1            |
| 7   | St. Alban's | 45-54    | Male   | Asian     | AL100SJ      | 0            | 1           | 0            |
| 8   | St. Alban's | 45-54    | Female | White     | WD62NU       | 1            | 1           | 1            |
| 9   | St. Alban's | 35 to 44 | Female | Asian     | AL100NB      | 1            | 1           | 1            |
| 10  | St. Alban's | 18 to 24 | Male   | Black     | CR92BB       | 1            | 1           | 1            |
| 11  | St. Alban's | 25 to 34 | Male   | White     | EN76JQ       | 0            | 1           | 1            |
| 12  | St. Alban's | 65+      | Female | White     | AL71PH       | 1            | 1           | 1            |
| 13  | St. Alban's | 65+      | Male   | White     | AL21PG       | 1            | 1           | 1            |
| 14  | St. Alban's | 35 to 44 | Male   | Other     | AL55SG       | 1            | 1           | 1            |
| 15  | St. Alban's | 45-54    | Male   | White     | NW22WA       | 1            | 1           | 1            |
| 16  | St. Alban's | 18 to 24 | Female | White     | AL23NS       | 1            | 1           | 1            |
| 17  | St. Alban's | 18 to 24 | Male   | White     | AL22DQ       | 1            | 1           | 1            |
| 18  | St. Alban's | 18 to 24 | Male   | White     | AL21ES       | 1            | 1           | 1            |
| 19  | St. Alban's | 18 to 24 | Female | Asian     | AL35NN       | 1            | 1           | 1            |
| 20  | Borough     | 18 to 24 | Male   | White     | N64DJ        | 1            | 1           | 1            |
| 21  | Borough     | 45-54    | Female | White     | WD79EH       | 1            | 1           | 1            |
| 22  | Borough     | 45-54    | Male   | Other     | N18          | 1            | 1           | 1            |
| 23  | Borough     | 18 to 24 | Female | Other     | LONDON       | 1            | 1           | 1            |
| 24  | Borough     | 18 to 24 | Female | White     | W130AC       | 1            | 1           | 1            |
| 25  | Borough     | 35 to 44 | Male   | White     | SW148DN      | 0            | 0           | 1            |
| 26  | Borough     | 65+      | Male   | White     | N170NU       | 1            | 0           | 0            |
| 27  | Borough     | 18 to 24 | Female | Other     | E175S2       | 1            | 1           | 1            |
| 28  | Borough     | 25 to 34 | Male   | Asian     | LU48SF       | 1            | 1           | 1            |
| 29  | Borough     | 25 to 34 | Female | White     | N35AZZ       | 1            | 1           | 1            |
| 30  | Borough     | 25 to 34 | Male   | Asian     | LEISTER      | 1            | 1           | 1            |
| 31  | Borough     | 35 to 44 | Female | White     | SE1          | 1            | 0           | 1            |
| 32  | Borough     | 25 to 34 | Male   | Other     | NW35UP       | 1            | 1           | 1            |
| 33  | Borough     | 25 to 34 | Male   | Black     | E136FN       | 1            | 1           | 1            |
| 34  | Borough     | 35 to 44 | Female | Other     | EN11HR       | 1            | 1           | 1            |
| 35  | Borough     | 35 to 44 | Female | White     | LIVERPOOL    | 1            | 1           | 1            |
| 36  | Borough     | 18 to 24 | Female | Asian     | LONDON       | 1            | 1           | 1            |
| 37  | Borough     | 18 to 24 | Male   | White     | EN61UX       | 1            | 1           | 1            |
| 38  | Borough     | 45-54    | Female | White     | SOUTH LONDON | 1            | 1           | 1            |
| 39  | Borough     | 18 to 24 | Female | Other     | LE159BP      | 1            | 1           | 1            |

| Rose-Detect | Lemon-ID | Mint-ID | Clove-ID | Rose-ID | Total-Detect | Total-ID | Interference | Lemon-ModDesc  |
|-------------|----------|---------|----------|---------|--------------|----------|--------------|----------------|
| 1           | 1        | 0       | 0        | 0       | 4            | 1        | 0            | citrus         |
| 1           | 1        | 0       | 0        | 0       | 4            | 1        | 0            | citrus         |
| 1           | 0        | 0       | 0        | 0       | 4            | 0        | 0            | other          |
| 1           | 1        | 1       | 1        | 0       | 4            | 3        | 0            | citrus         |
| 1           | 1        | 1       | 0        | 0       | 4            | 2        | 0            | citrus         |
| 0           | 0        | 1       | 1        |         | 3            | 2        | 0            | no association |
| 1           |          | 1       |          | 1       | 2            | 2        | 0            | no smell       |
| 0           | 1        | 1       | 1        |         | 3            | 3        | 0            | citrus         |
| 1           | 0        | 1       | 1        | 0       | 4            | 2        | 0            | other          |
| 1           | 1        | 0       | 0        | 0       | 4            | 1        | 0            | citrus         |
| 1           |          | 1       | 0        | 1       | 3            | 2        | 0            | no smell       |
| 1           | 0        | 0       | 0        | 0       | 4            | 0        | 0            | other          |
| 1           | 1        | 1       | 0        | 1       | 4            | 3        | 0            | citrus         |
| 1           | 0        | 1       | 1        | 1       | 4            | 3        | 0            | other          |
| 1           | 1        | 1       | 1        | 1       | 4            | 4        | 0            | citrus         |
| 1           | 0        | 1       | 0        | 0       | 4            | 1        | 0            | other          |
| 0           | 0        | 1       | 0        |         | 3            | 1        | 0            | no association |
| 0           | 0        | 1       | 0        |         | 3            | 1        | 0            | other          |
| 1           | 1        | 1       | 1        | 0       | 4            | 3        | 0            | citrus         |
| 1           | 1        | 0       | 0        | 1       | 4            | 2        | 0            | citrus         |
| 1           | 1        | 1       | 1        | 1       | 4            | 4        | 0            | citrus         |
| 1           | 0        | 1       | 0        | 1       | 4            | 2        | 0            | other          |
| 1           | 1        | 0       | 1        | 1       | 4            | 3        | 1            | citrus         |
| 1           | 1        | 1       | 0        | 0       | 4            | 2        | 1            | citrus         |
| 1           |          |         | 0        | 0       | 2            | 0        | 0            | no smell       |
| 1           | 0        |         |          | 0       | 2            | 0        | 0            | other          |
| 0           | 1        | 1       | 1        |         | 3            | 3        | 0            | citrus         |
| 1           | 0        | 0       | 0        | 1       | 4            | 1        | 0            | other          |
| 1           | 0        | 1       | 0        | 1       | 4            | 2        | 0            | no association |
| 1           | 0        | 0       | 0        | 0       | 4            | 0        | 0            | other          |
| 1           | 1        |         | 0        | 0       | 3            | 1        | 0            | citrus         |
| 0           | 1        | 1       | 0        |         | 3            | 2        | 0            | citrus         |
| 1           | 0        | 1       | 1        | 0       | 4            | 2        | 1            | other          |
| 1           | 0        | 0       | 1        | 0       | 4            | 1        | 1            | other          |
| 0           | 0        | 1       | 1        |         | 3            | 2        | 0            | no association |
| 1           | 1        | 1       | 0        | 0       | 4            | 2        | 1            | citrus         |
| 1           | 0        | 1       | 1        | 1       | 4            | 3        | 0            | no association |
| 1           | 1        | 1       | 0        | 0       | 4            | 2        | 0            | citrus         |
| 0           | 0        | 0       | 1        |         | 3            | 1        | 0            | other          |

| Mint-ModDesc   | Clove-ModDesc  | Rose-ModDesc   | Lemon-OrigDesc           | Mint-OrigDesc              |
|----------------|----------------|----------------|--------------------------|----------------------------|
| no association | other          | other          | lemon citrusy            | no association             |
| other          | other          | other          | lemon                    | Sherbet                    |
| other          | other          | other          | liquorice                | smelling salts             |
| mint           | spice          | no association | orange                   | minty medicine smell       |
| other          | other          | other          | orange citrus            | tea tree oil               |
| mint           | spice          | no smell       | no association           | medical menthol            |
| mint           | no smell       | flower         | no smell                 | vicks vapour rub menthol   |
| mint           | spice          | no smell       | lemon citrus             | menthol vicks              |
| mint           | spice          | other          | woody smell trees        | minty vicks rub            |
| other          | other          | no association | citrus henna             | henna                      |
| mint           | other          | flower         | no smell                 | menthol vicks vapour rub   |
| other          | other          | other          | mint herbs               | sweet flowery              |
| mint           | other          | flower         | fruity smell             | medical rub mint           |
| mint           | spice          | flower         | spice                    | menthol                    |
| mint           | other          | flower         | floor wipes citrus fruit | menthol glacier mint       |
| mint           | other          | other          | grass outdoors           | minty                      |
| mint           | no association | no smell       | no association           | minty smell                |
| mint           | other          | no smell       | woody smell              | menthol                    |
| mint           | spice          | no association | citrus                   | minty smell                |
| no association | no association | flower         | sweet lime               | no association             |
| mint           | spice          | flower         | citrus orange            | menthol vicks              |
| mint           | rotten         | flower         | mint                     | vicks                      |
| frying         | spice          | flower         | lemon juice bark         | fried chicken              |
| mint           | rotten         | frying         | orange                   | minty                      |
| no smell       | other          | other          | no smell                 | no smell                   |
| no smell       | no smell       | other          | polish                   | no smell                   |
| mint           | spice          | no smell       | wet tree lemon           | mint                       |
| no association | no association | flower         | herb sharp smell         | no association             |
| mint           | no association | flower         | no association           | mint                       |
| other          | other          | other          | smoke                    | washing up liquid          |
| no smell       | other          | no association | citrus smell fruity      | no smell                   |
| mint           | other          | no smell       | lemon                    | mint                       |
| mint           | spice          | frying         | pine tree woody          | vicks                      |
| frying         | spice          | frying         | wood smell               | frying smell               |
| mint           | spice          | no smell       | no association           | vicks                      |
| mint           | frying         | frying         | candle smell lemony      | menthol                    |
| mint           | spice          | flower         | no association           | mint                       |
| mint           | other          | other          | lemony smell             | minty smell                |
| other          | spice          | no smell       | tree outdoors nature     | chemical washing up liquid |

| Clove-OrigDesc            | Rose-OrigDesc                   |
|---------------------------|---------------------------------|
| grass outdoors            | rubber plastic                  |
| dentist cleaner           | pollen                          |
| hospital cleaner          | damp clothes                    |
| spice                     | no association                  |
| wallflower flowery        | paint                           |
| spice nutmeg cinnamon     | no smell                        |
| no smell                  | lily blossom                    |
| anise seed dentist        | no smell                        |
| cloves spice              | sweet perfume fragrance         |
| tea                       | no association                  |
| scented candle christmas  | flowers                         |
| spicy indian food         | disinfectant cleaning materials |
| wood smell                | flower rose                     |
| cloves                    | rose                            |
| incense                   | daffodil freshly cut flowers    |
| carpet cleaner            | glade scent                     |
| no association            | no smell                        |
| scented candle            | no smell                        |
| cinnamon                  | no association                  |
| no association            | roses sweet smell               |
| cinnamon spice            | polish lavender                 |
| rotten tree wet           | flowers                         |
| herbs spices              | lavender flowers                |
| dead flowers rotten       | frying smell                    |
| cough sweets              | soil                            |
| no smell                  | mould                           |
| cinnamon sticks           | no smell                        |
| no association            | flower                          |
| no association            | flowers                         |
| henna ink                 | leaf tree                       |
| flowery smell             | no association                  |
| vanilla                   | no smell                        |
| spice cinnamon christmasy | grease                          |
| cloves                    | frying smell                    |
| spicy                     | no smell                        |
| background frying smell   | background frying smell         |
| cinnamon                  | flowery smell                   |
| wet flowers               | bark                            |
| spice cinnamon            | no smell                        |

|      |           |              | Borough |       |      | St. Alban's |      |             |      |
|------|-----------|--------------|---------|-------|------|-------------|------|-------------|------|
|      |           |              | LR      | df    | Sig  | LR          | df   | Sig         |      |
| Sex  | Detect    | Lemon        | 1.66    | 1     | 0.45 | 1.97        | 1    | 0.51        |      |
|      |           | Mint         | 0.67    | 1     | 0.57 | a           |      |             |      |
|      |           | Clove        | 1.66    | 1     | 0.45 | 0.95        | 1    | 1.00        |      |
|      |           | Rose         | 0.85    | 1     | 0.59 | 0.37        | 1    | 0.60        |      |
|      | ID        | Lemon        | 2.87    | 1     | 0.17 | 0.49        | 1    | 0.64        |      |
|      |           | Mint         | 0.30    | 1     | 0.64 | 0.88        | 1    | 0.60        |      |
|      |           | Clove        | 1.71    | 1     | 0.35 | 5.25        | 1    | <b>0.05</b> |      |
|      |           | Rose         | 0.26    | 1     | 1.00 | 5.23        | 1    | 0.10        |      |
|      |           | Interference |         | 1.79  | 1    | 0.32        | a    |             |      |
|      | Ethnicity | Detect       | Lemon   | 1.44  | 3    | 1.00        | 1.92 | 3           | 0.54 |
|      |           |              | Mint    | 4.69  | 3    | 0.36        | a    |             |      |
|      |           |              | Clove   | 1.44  | 3    | 1.00        | 4.02 | 3           | 0.32 |
| Rose |           |              | 5.20    | 3     | 0.25 | 3.51        | 3    | 0.51        |      |
| ID   |           | Lemon        | 1.79    | 3     | 1.00 | 4.10        | 3    | 0.72        |      |
|      |           | Mint         | 4.20    | 3     | 0.47 | 3.08        | 3    | 0.67        |      |
|      |           | Clove        | 6.77    | 3     | 0.14 | 7.24        | 3    | <b>0.09</b> |      |
|      |           | Rose         | 1.93    | 3     | 1.00 | 3.82        | 3    | 0.56        |      |
|      |           | Interference |         | 4.53  | 3    | 0.33        | a    |             |      |
| Age  |           | Detect       | Lemon   | 3.44  | 4    | 0.40        | 5.15 | 4           | 0.25 |
|      |           |              | Mint    | 11.36 | 4    | <b>0.01</b> | a    |             |      |
|      |           |              | Clove   | 7.94  | 4    | <b>0.05</b> | 4.02 | 4           | 0.42 |
|      | Rose      |              | 2.14    | 4     | 0.91 | 2.86        | 4    | 0.85        |      |
|      | ID        | Lemon        | 5.27    | 4     | 0.47 | 5.63        | 4    | 0.51        |      |
|      |           | Mint         | 3.01    | 3     | 0.68 | 5.21        | 4    | 0.44        |      |
|      |           | Clove        | 1.94    | 3     | 0.65 | 11.18       | 4    | <b>0.05</b> |      |
|      |           | Rose         | 5.84    | 4     | 0.44 | 8.69        | 4    | 0.15        |      |
|      |           | Interference |         | 3.43  | 4    | 0.77        | a    |             |      |

a-cell contains fewer than 5

|             |             |           | <b>F</b> | <b>df</b> | <b>Sig.</b> | <b>Effect</b> | <b>Obs</b> | <b>Power</b> |
|-------------|-------------|-----------|----------|-----------|-------------|---------------|------------|--------------|
| Borough     | TotalDetect | Age       | 6.48     | 4         | <b>0.02</b> | 0.81          |            | 0.80         |
|             |             | Sex       | 3.00     | 1         | 0.13        | 0.33          |            | 0.31         |
|             |             | Ethnicity | 1.99     | 3         | 0.22        | 0.50          |            | 0.30         |
| St. Alban's |             | Age       | 0.12     | 4         | 0.97        | 0.07          |            | 0.06         |
|             |             | Sex       | 0.80     | 1         | 0.41        | 0.12          |            | 0.12         |
|             |             | Ethnicity | 1.62     | 2         | 0.27        | 0.35          |            | 0.23         |
| Borough     | TotalID     | Age       | 2.10     | 4         | 0.20        | 0.58          |            | 0.33         |
|             |             | Sex       | 0.32     | 1         | 0.59        | 0.05          |            | 0.08         |
|             |             | Ethnicity | 0.47     | 3         | 0.72        | 0.19          |            | 0.10         |
| St. Alban's |             | Age       | 3.48     | 4         | 0.08        | 0.70          |            | 0.52         |
|             |             | Sex       | 0.01     | 1         | 0.94        | 0.00          |            | 0.05         |
|             |             | Ethnicity | 0.30     | 2         | 0.75        | 0.09          |            | 0.08         |

|               | <b>Action</b> | <b>Odor</b>  | <b>LR</b> | <b>df</b> | <b>Sig</b> |      |
|---------------|---------------|--------------|-----------|-----------|------------|------|
| <b>Female</b> | Detect        | Lemon        | 0.13      | 1         | 1.00       |      |
|               |               | Mint         | 3.67      | 1         | 0.17       |      |
|               |               | Clove        | 0.05      | 1         | 1.00       |      |
|               |               | Rose         | 0.13      | 1         | 1.00       |      |
|               | ID            | Lemon        | 2.27      | 1         | 0.19       |      |
|               |               | Mint         | 0.17      | 1         | 1.00       |      |
|               |               | Clove        | 0.13      | 1         | 1.00       |      |
|               |               | Rose         | 0.00      | 1         | 1.00       |      |
|               |               | Interference |           | 1.76      | 1          | 0.43 |
|               | <b>Male</b>   | Detect       | Lemon     | a         |            |      |
| Mint          |               |              | 1.02      | 1         | 1.00       |      |
| Clove         |               |              | a         |           |            |      |
| Rose          |               |              | 0.00      | 1         | 1.00       |      |
| Rose          |               |              | 1.29      | 1         | 0.51       |      |
| ID            |               | Lemon        | 0.75      | 1         | 0.63       |      |
|               |               | Mint         | 0.59      | 1         | 0.60       |      |
|               |               | Clove        | 0.52      | 1         | 0.64       |      |
|               |               | Rose         | 3.46      | 1         | 0.23       |      |
|               |               | Interference |           | 4.65      | 1          | 0.12 |

a-cell contains fewer than 5

|       | <b>Action</b> | <b>Odor</b>  | <b>LR</b> | <b>df</b> | <b>Sig.</b> |       |
|-------|---------------|--------------|-----------|-----------|-------------|-------|
| Asian | Detect        | Lemon        | 1.588     | 1         | 1.000       |       |
|       |               | Mint         | a         |           |             |       |
|       |               | Clove        | 1.588     | 1         | 1.000       |       |
|       |               | Rose         | a         |           |             |       |
|       | ID            | Lemon        | 0.138     | 1         | 1.000       |       |
|       |               | Mint         | 3.819     | 1         | 0.400       |       |
|       |               | Clove        | 6.730     | 1         | 0.100       |       |
|       |               | Rose         | 0.000     | 1         | 1.000       |       |
|       |               | Interference |           | 1.588     | 1           | 1.000 |
|       | Black         | Detect       | Lemon     | a         |             |       |
| Mint  |               |              | a         |           |             |       |
| Clove |               |              | a         |           |             |       |
| Rose  |               |              | a         |           |             |       |
| ID    |               | Lemon        | 3.819     | 1         | 0.333       |       |
|       |               | Mint         | 1.046     | 1         | 1.000       |       |
|       |               | Clove        | 1.046     | 1         | 1.000       |       |
|       |               | Rose         | a         |           |             |       |
|       |               | Interference |           | 3.819     | 1           | 0.333 |
| Other |               | Detect       | Lemon     | a         |             |       |
|       | Mint          |              | a         |           |             |       |
|       | Clove         |              | a         |           |             |       |
|       | Rose          |              | 1.243     | 1         | 1.000       |       |
|       | ID            | Lemon        | 1.243     | 1         | 1.000       |       |
|       |               | Mint         | 1.243     | 1         | 1.000       |       |
|       |               | Clove        | 0.738     | 1         | 1.000       |       |
|       |               | Rose         | 0.680     | 1         | 1.000       |       |
|       |               | Interference |           | 0.738     | 1           | 1.000 |
|       | White         | Detect       | Lemon     | 0.038     | 1           | 1.000 |
| Mint  |               |              | 5.594     | 1         | 0.068       |       |
| Clove |               |              | 1.725     | 1         | 0.435       |       |
| Rose  |               |              | 1.535     | 1         | 0.339       |       |
| ID    |               | Lemon        | 0.064     | 1         | 1.000       |       |
|       |               | Mint         | 0.703     | 1         | 0.613       |       |
|       |               | Clove        | 0.279     | 1         | 0.655       |       |
|       |               | Rose         | 0.234     | 1         | 1.000       |       |
|       |               | Interference |           | 1.725     | 1           | 0.435 |

a-cell contains fewer than 5

| Age          |              |        | LR    | df   | Sig. |
|--------------|--------------|--------|-------|------|------|
| 18-24        | Detect       | Lemon  | a     |      |      |
|              |              | Mint   | a     |      |      |
|              |              | Clove  | a     |      |      |
|              |              | Rose   | 0.00  | 1    | 1.00 |
|              | ID           | Lemon  | 0.31  | 1    | 1.00 |
|              |              | Mint   | 0.31  | 1    | 1.00 |
|              |              | Clove  | 1.19  | 1    | 0.59 |
|              |              | Rose   | 5.49  | 1    | 0.17 |
|              | Interference |        | 4.99  | 1    | 0.19 |
|              | 25-34        | Detect | Lemon | 2.21 | 1    |
| Mint         |              |        | a     |      |      |
| Clove        |              |        | a     |      |      |
| Rose         |              |        | 1.02  | 1    | 1.00 |
| ID           |              | Lemon  | 0.60  | 1    | 1.00 |
|              |              | Mint   | 0.54  | 1    | 1.00 |
|              |              | Clove  | 1.02  | 1    | 1.00 |
|              |              | Rose   | 0.20  | 1    | 1.00 |
| Interference |              |        | 1.02  | 1    | 1.00 |
| 35-44        |              | Detect | Lemon | 0.91 | 1    |
|              | Mint         |        | 2.09  | 1    | 0.47 |
|              | Clove        |        | a     |      |      |
|              | Rose         |        | 0.91  | 1    | 1.00 |
|              | ID           | Lemon  | 1.19  | 1    | 1.00 |
|              |              | Mint   | 1.73  | 1    | 1.00 |
|              |              | Clove  | 2.09  | 1    | 0.47 |
|              |              | Rose   | 2.23  | 1    | 0.40 |
|              | Interference |        | 0.91  | 1    | 1.00 |
|              | 45-54        | Detect | Lemon | 1.59 | 1    |
| Mint         |              |        | a     |      |      |
| Clove        |              |        | 1.59  | 1    | 1.00 |
| Rose         |              |        | 1.59  | 1    | 1.00 |
| ID           |              | Lemon  | 1.19  | 1    | 1.00 |
|              |              | Mint   | a     |      |      |
|              |              | Clove  | 2.91  | 1    | 0.40 |
|              |              | Rose   | 1.19  | 1    | 0.40 |
| Interference |              |        | a     |      |      |
| 65+          |              | Detect | Lemon | a    | 1    |
|              | Mint         |        | 5.00  | 1    | 0.20 |
|              | Clove        |        | 5.00  | 1    | 0.20 |
|              | Rose         |        | 0.51  | 1    | 1.00 |
|              | ID           | Lemon  | 1.19  | 1    | 1.00 |
|              |              | Mint   | a     |      |      |
|              |              | Clove  | a     |      |      |
|              |              | Rose   | 0.68  | 1    | 1.00 |
|              | Interference |        | a     |      |      |

a-cell contains fewer than 5

|        |        | Levene | Sig  | F    | df | Sig         | Effect | Obs | Power |
|--------|--------|--------|------|------|----|-------------|--------|-----|-------|
| Female | Detect | 1.34   | 0.26 | 0.17 | 1  | 0.69        | 0.01   |     | 0.07  |
|        | ID     | 0.04   | 0.85 | 0.70 | 1  | 0.41        | 0.04   |     | 0.13  |
| Male   | Detect | 0.45   | 0.51 | 0.11 | 1  | 0.75        | 0.01   |     | 0.06  |
|        | ID     | 0.33   | 0.58 | 0.03 | 1  | 0.86        | 0.00   |     | 0.05  |
| Asian  | Detect | 16.00  | 0.02 | 1.00 | 1  | 0.37        | 0.20   |     | 0.12  |
|        | ID     | 0.40   | 1.00 | 4.00 | 1  | 0.12        | 0.50   |     | 0.34  |
| Black  | Detect | .      | .    | .    | 1  | .           | .      |     | .     |
|        | ID     | .      | .    | 0.00 | 1  | 1.00        | 0.00   |     | 0.05  |
| Other  | Detect | .      | .    | 0.71 | 1  | 0.44        | 0.13   |     | 0.11  |
|        | ID     | 1.43   | 0.29 | 1.07 | 1  | 0.35        | 0.18   |     | 0.14  |
| White  | Detect | 5.23   | 0.03 | 0.58 | 1  | 0.45        | 0.03   |     | 0.11  |
|        | ID     | 0.09   | 0.77 | 0.13 | 1  | 0.72        | 0.01   |     | 0.06  |
| 18-24  | Detect | 0.00   | 1.00 | 0.00 | 1  | 1.00        | 0.00   |     | 0.05  |
|        | ID     | 0.00   | 1.00 | 0.00 | 1  | 1.00        | 0.00   |     | 0.05  |
| 25-34  | Detect | 0.48   | 0.51 | 0.14 | 1  | 0.73        | 0.02   |     | 0.06  |
|        | ID     | 0.48   | 0.51 | 0.14 | 1  | 0.73        | 0.02   |     | 0.06  |
| 35-44  | Detect | 1.33   | 0.31 | 2.67 | 1  | 0.18        | 0.40   |     | 0.24  |
|        | ID     | 1.33   | 0.31 | 2.67 | 1  | 0.18        | 0.47   |     | 0.24  |
| 45-54  | Detect | 4.00   | 0.12 | 3.00 | 1  | 0.16        | 0.43   |     | 0.27  |
|        | ID     | 4.00   | 0.12 | 3.00 | 1  | 0.16        | 0.43   |     | 0.27  |
| 65+    | Detect | 1.80   | 0.27 | 9.80 | 1  | <b>0.05</b> | 0.77   |     | 0.57  |
|        | ID     | 1.80   | 0.27 | 9.80 | 1  | <b>0.05</b> | 0.77   |     | 0.57  |

|              |       | Value | df | Exact Sig. (2-sided) |
|--------------|-------|-------|----|----------------------|
| Detect       | Lemon | 0.43  | 1  | 0.61                 |
|              | Mint  | 4.24  | 1  | 0.23                 |
|              | Clove | 0.00  | 1  | 1.00                 |
|              | Rose  | 0.01  | 1  | 1.00                 |
| ID           | Lemon | 0.11  | 1  | 1.00                 |
|              | Mint  | 0.34  | 1  | 0.72                 |
|              | Clove | 0.04  | 1  | 1.00                 |
|              | Rose  | 0.36  | 1  | 0.72                 |
| Interference |       | 7.38  | 1  | <b>0.05</b>          |

|        | <b>Levene</b> | <b>Sig</b> | <b>F</b> | <b>df</b> | <b>Sig</b> | <b>Effect</b> | <b>Obs</b> | <b>Power</b> |
|--------|---------------|------------|----------|-----------|------------|---------------|------------|--------------|
| Detect | 0.64          | 0.43       | 0.16     | 1         | 0.70       | 0.00          |            | 0.07         |
| ID     | 0.22          | 0.64       | 0.07     | 1         | 0.76       | 0.00          |            | 0.06         |

|           |       | <b>LR</b> | <b>df</b> | <b>Sig.</b> |
|-----------|-------|-----------|-----------|-------------|
| Market    | Lemon | 0.59      | 3         | 1.00        |
|           | Mint  | 8.74      | 4         | 0.14        |
|           | Clove | 7.77      | 5         | 0.32        |
|           | Rose  | 7.73      | 4         | 0.17        |
| Sex       | Lemon | 5.05      | 3         | 0.27        |
|           | Mint  | 8.54      | 4         | 0.15        |
|           | Clove | 14.02     | 5         | <b>0.02</b> |
|           | Rose  | 6.34      | 4         | 0.27        |
| Ethnicity | Lemon | 7.05      |           | 0.62        |
|           | Mint  | 12.52     | 12        | 0.50        |
|           | Clove | 17.95     | 15        | 0.24        |
|           | Rose  | 22.74     | 12        | <b>0.04</b> |
| Age       | Lemon | 19.07     | 12        | 0.65        |
|           | Mint  | 16.64     | 16        | 0.14        |
|           | Clove | 20.48     | 20        | 0.52        |
|           | Rose  | 15.11     | 16        | 0.80        |

|           |       |             |        |                |                |          |        |       |       |
|-----------|-------|-------------|--------|----------------|----------------|----------|--------|-------|-------|
|           |       |             | citrus | no association | no smell       | other    | total  |       |       |
|           | Lemon | Borough     | 9      | 3              | 1              | 7        | 20     |       |       |
|           |       | St. Alban's | 9      | 2              | 2              | 6        | 19     |       |       |
|           |       |             | frying | mint           | no association | no smell | other  | Total |       |
|           | Mint  | Borough     | 2      | 11             | 2              | 3        | 2      | 20    |       |
|           |       | St. Alban's | 0      | 13             | 1              | 0        | 5      | 19    |       |
|           |       |             | frying | no association | no smell       | other    | rotten | spice | Total |
|           | Clove | Borough     | 1      | 3              | 1              | 5        | 2      | 8     | 20    |
|           |       | St. Alban's | 0      | 1              | 1              | 11       | 0      | 6     | 19    |
|           |       |             | flower | frying         | no association | no smell | other  | Total |       |
|           | Rose  | Borough     | 7      | 4              | 1              | 4        | 4      | 20    |       |
|           |       | St. Alban's | 5      | 0              | 3              | 4        | 7      | 19    |       |
| Sex       |       |             | citrus | no association | no smell       | other    | Total  |       |       |
|           | Lemon | Female      | 8      | 2              | 3              | 8        | 21     |       |       |
|           |       | Male        | 10     | 3              | 0              | 5        | 18     |       |       |
|           |       |             | frying | mint           | no association | no smell | other  | total |       |
|           | Mint  | Female      | 0      | 11             | 3              | 2        | 5      | 21    |       |
|           |       |             | frying | no association | no smell       | other    | rotten | spice |       |
|           | Clove | Female      | 0      | 3              | 2              | 12       | 1      | 3     | 21    |
|           |       | Male        | 1      | 1              | 0              | 4        | 1      | 11    | 18    |
|           |       |             | flower | frying         | no association | no smell | other  |       |       |
|           | Rose  | Female      | 9      | 1              | 1              | 3        | 7      | 21    |       |
|           |       | Male        | 3      | 3              | 3              | 5        | 4      | 18    |       |
| Ethnicity |       |             | citrus | no association | no smell       | other    |        |       |       |
|           | Lemon | Asian       | 2      | 0              | 1              | 3        | 6      |       |       |
|           |       | Black       | 2      | 0              | 0              | 1        | 3      |       |       |
|           |       | Other       | 3      | 0              | 0              | 4        | 7      |       |       |
|           |       | White       | 11     | 5              | 2              | 5        | 23     |       |       |
|           |       |             | frying | mint           | no association | no smell | other  |       |       |
|           | Mint  | Asian       | 0      | 4              | 1              | 0        | 1      | 6     |       |
|           |       | Black       | 0      | 2              | 0              | 0        | 1      | 3     |       |
|           |       | Other       | 2      | 4              | 0              | 0        | 1      | 7     |       |
|           |       | White       | 0      | 14             | 2              | 3        | 4      | 23    |       |
|           |       |             | frying | no association | no smell       | other    | rotten | spice |       |
|           | Clove | Asian       | 1      | 1              | 1              | 1        | 0      | 2     | 6     |
|           |       | Black       | 0      | 0              | 0              | 1        | 0      | 2     | 3     |
|           |       | Other       | 0      | 0              | 0              | 1        | 1      | 5     | 7     |
|           |       | White       | 0      | 3              | 1              | 13       | 1      | 5     | 23    |
|           |       |             | flower | frying         | no association | no smell | other  |       |       |
|           | Rose  | Asian       | 2      | 1              | 1              | 0        | 2      | 6     |       |
|           |       | Black       | 0      | 1              | 2              | 0        | 0      | 3     |       |
|           |       | Other       | 3      | 1              | 0              | 3        | 0      | 7     |       |
|           |       | White       | 7      | 1              | 1              | 5        | 9      | 23    |       |
| Age       |       |             | citrus | no association | no smell       | other    |        |       |       |
|           | Lemon | 18 to 24    | 9      | 2              | 0              | 3        | 14     |       |       |
|           |       | 25 to 34    | 2      | 1              | 1              | 4        | 8      |       |       |
|           |       | 35 to 44    | 1      | 1              | 1              | 3        | 6      |       |       |
|           |       | 45-54       | 4      | 0              | 1              | 1        | 6      |       |       |

|       |          |        |                |                |          |        |       |
|-------|----------|--------|----------------|----------------|----------|--------|-------|
|       | 65+      | 2      | 1              | 0              | 2        | 5      |       |
|       |          | frying | mint           | no association | no smell | other  |       |
| Mint  | 18 to 24 | 1      | 9              | 1              | 0        | 3      | 14    |
|       | 25 to 34 | 0      | 4              | 2              | 0        | 2      | 8     |
|       | 35 to 44 | 1      | 3              | 0              | 2        | 0      | 6     |
|       | 45-54    | 0      | 6              | 0              | 0        | 0      | 6     |
|       | 65+      | 0      | 2              | 0              | 1        | 2      | 5     |
|       |          | frying | no association | no smell       | other    | rotten | spice |
| Clove | 18 to 24 | 1      | 2              | 0              | 4        | 1      | 6     |
|       | 25 to 34 | 0      | 2              | 0              | 5        | 0      | 1     |
|       | 35 to 44 | 0      | 0              | 0              | 2        | 0      | 4     |
|       | 45-54    | 0      | 0              | 1              | 2        | 1      | 2     |
|       | 65+      | 0      | 0              | 1              | 3        | 0      | 1     |
|       |          | flower | frying         | no association | no smell | other  |       |
| Rose  | 18 to 24 | 3      | 2              | 3              | 4        | 2      | 14    |
|       | 25 to 34 | 3      | 1              | 0              | 1        | 3      | 8     |
|       | 35 to 44 | 1      | 1              | 1              | 1        | 2      | 6     |
|       | 45-54    | 4      | 0              | 0              | 1        | 1      | 6     |
|       | 65+      | 1      | 0              | 0              | 1        | 3      | 5     |
